# Supplementary material
Source: PubMed Central journal article supplement (PMC3045807)
Supplement: NIHMS270587-supplement-01.pdf [file NIHMS270587-supplement-01.pdf]

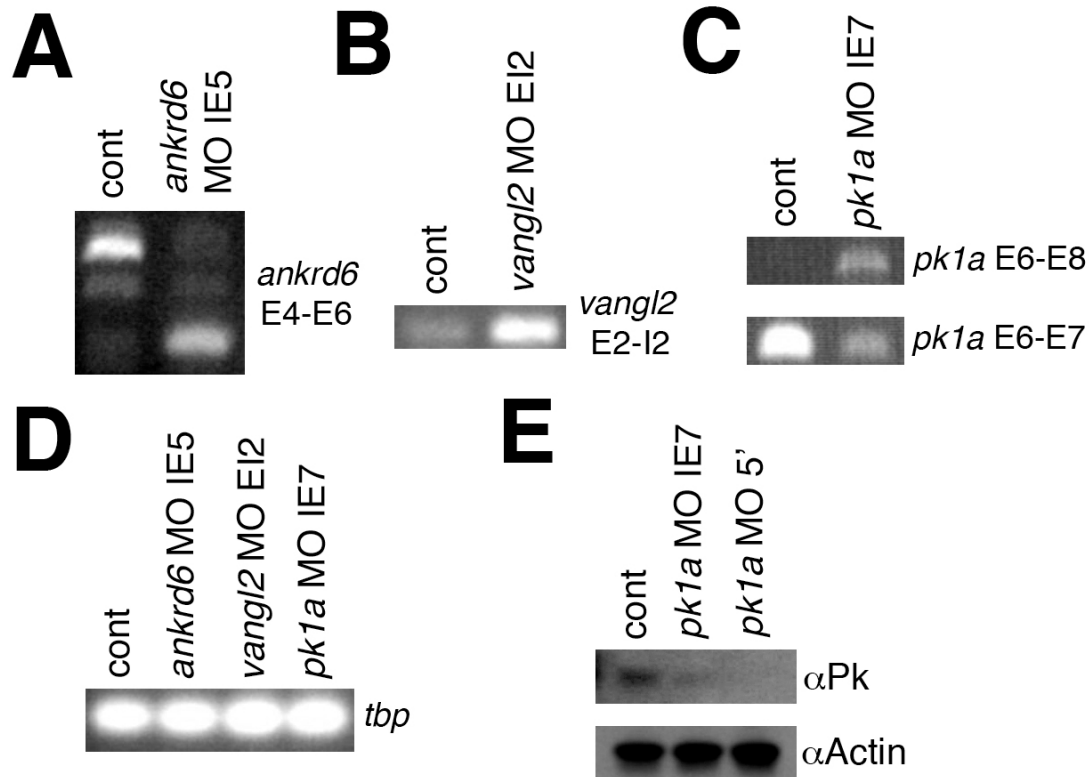

**Figure S1. Documentation of morpholino knockdown.** (A-D) PCR of 24 hpf embryos injected at the 1-cell stage with control and (A) *ankrd6* morpholino (MO), (B) *vangl2* MO, (C) *pk1a* MO, and each of the above (D), at the amounts used to elicit the phenotypes noted elsewhere (1.5 ng). (A) There is loss of a 375 bp *ankrd6* PCR product spanning exon 4 and exon 6 (E4-E6) in embryos injected with an *ankrd6* MO designed to inhibit splicing into exon 5. The lower part of the panel shows a 125 bp band using the same primers in the same embryos that results from loss of the ~250 bp exon 5. (B) A 202 bp *vangl2* PCR product spanning exon 2 (E2) and the intron between exons 2 and 3 (I2) in embryos injected with a *vangl2* MO designed to inhibit splicing out of I2, which introduces an in-frame stop codon from sequence within the second intron. (C) A novel 650 bp PCR product spanning *pk1a* exons 6 and 8 in embryos injected with *pk1a* MO designed to inhibit splicing into exon 7, as well as a decrease in a 200 bp PCR product spanning E6 and E7 in the same embryos. (D) Apparently similar amounts of a 100 bp *tbp* PCR product in embryos from each of the above knockdowns. The above results were confirmed using real-time quantitative PCR normalized against *hprt* or *cp* (ceruloplasmin). (E) Western blot analysis of 3 dpf larvae injected at 2 dpf with control (cont) or *pk1a* MOs. The upper panel shows a decrease in the 70 kDa Prickle band using anti-Prickle ( $\alpha$ Pk) antibody, while the lower shows constant Actin expression using  $\alpha$ Actin antibody.

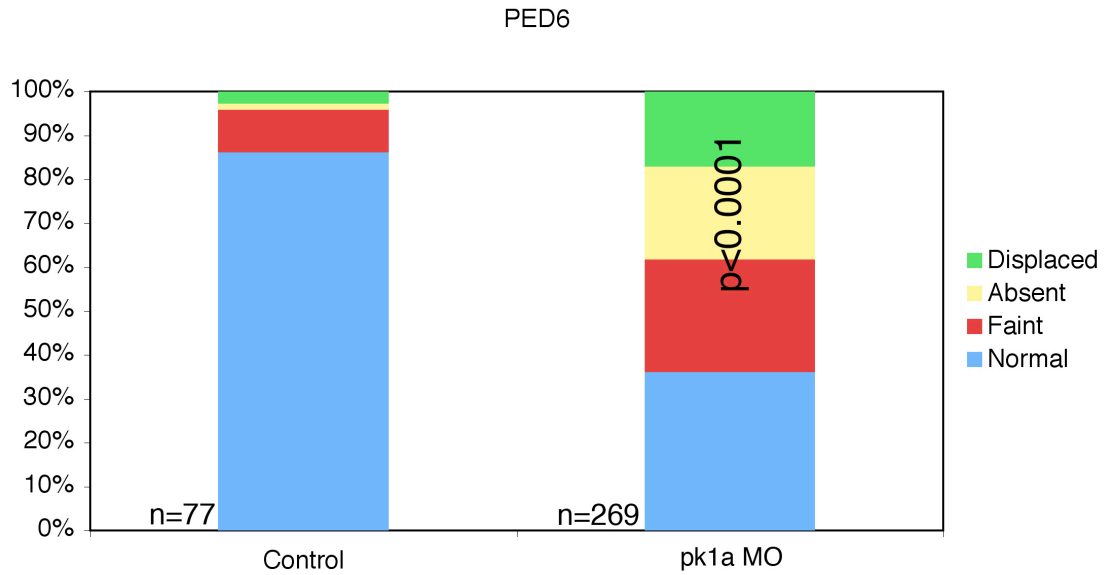

**Figure S2. Abnormal gallbladder sidedness in *pk1a* morphants.** PED6 uptake of control and *pk1a* MO-injected 5 dpf larvae, scored for normal right-sided placement, faint or absent intensity, or displacement to the left side. The total number of abnormal gallbladders is significantly increased in the *pk1a* morphants ( $p < 0.0001$ , as depicted, by chi-square analysis), as is the number of displaced gallbladders ( $p < 0.0001$ ).

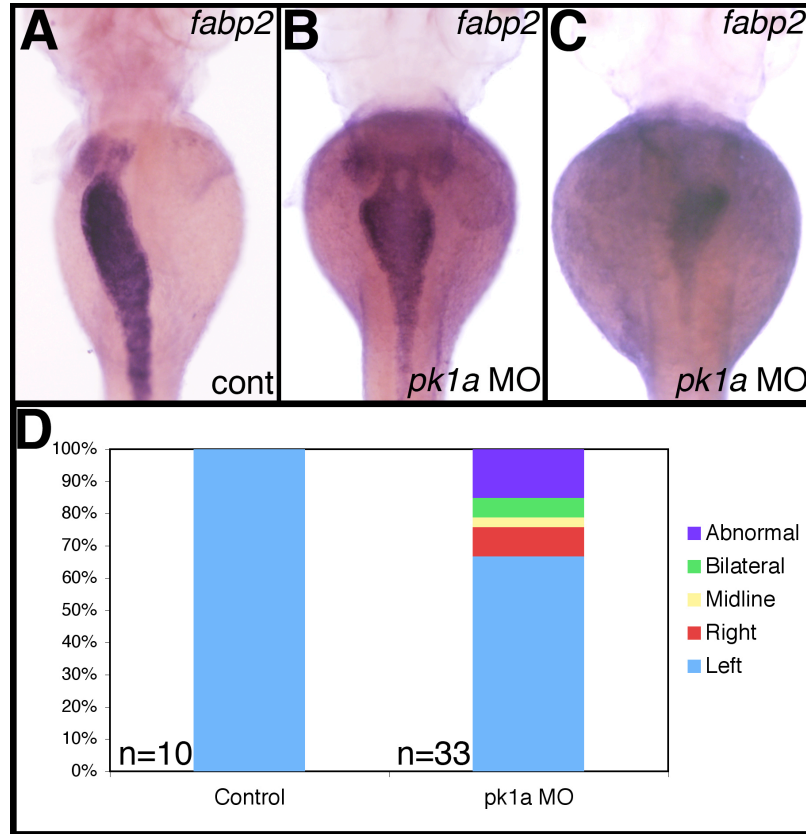

**Figure S3. Abnormal intestine localization in *pk1a* morphants.** Whole-mount in situ hybridization of fatty acid binding protein 2 (*fabp2*), an intestinal marker, in 3 dpf control (A) and *pk1a* morphants demonstrates abnormal intestine location, including “bilateral” (B), and “right” (C). (D) Graph depicting the scoring of *pk1a* morphants demonstrates a significant difference in the number of abnormally localized intestines (0% vs. 33%,  $p < 0.0001$  by chi-square test). Note that the *fabp2* probe also faintly stains the liver.

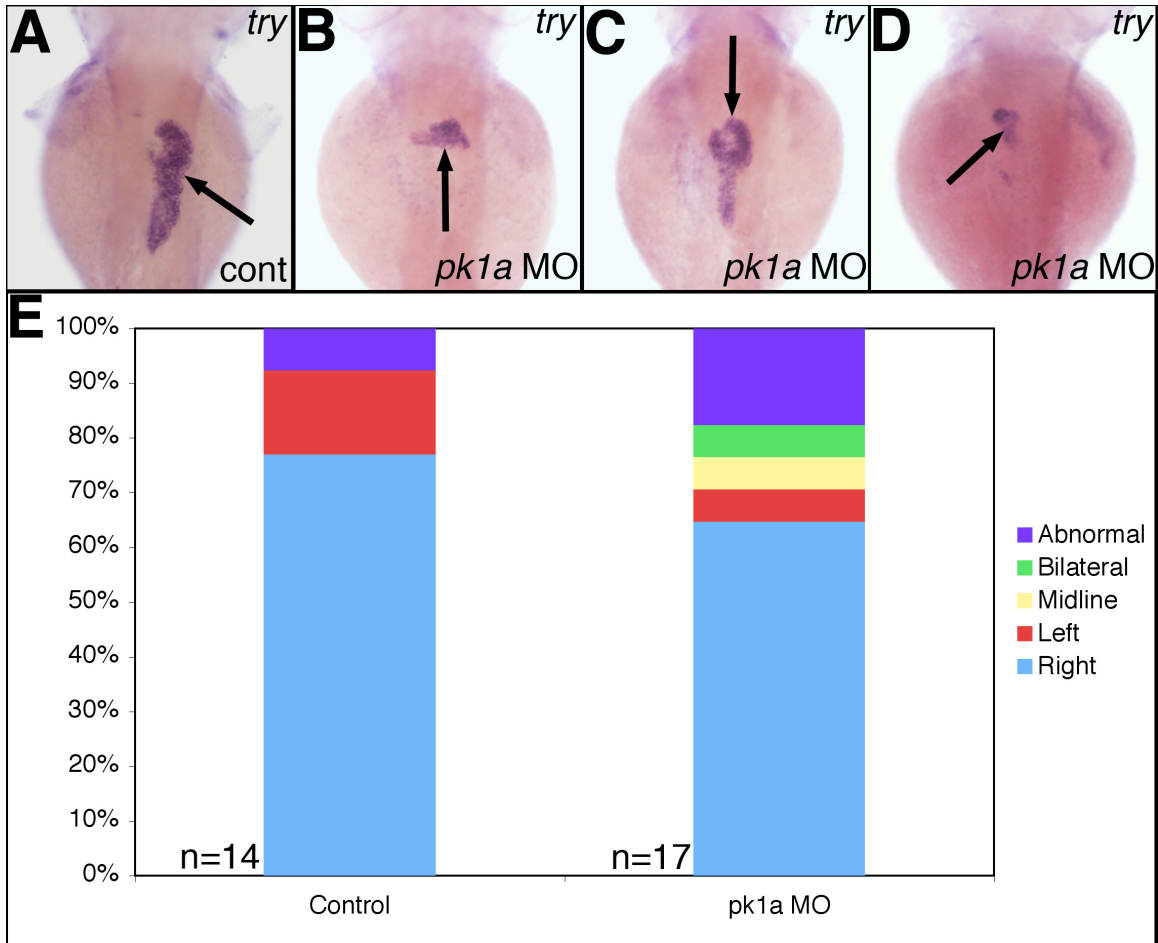

**Figure S4. Marginally abnormal exocrine pancreas localization in *pk1a* morphants.** Whole-mount in situ hybridization of *trypsin* (*try*), an exocrine pancreas marker, in 3 dpf control (A) and *pk1a* morphants demonstrates abnormal exocrine pancreas location, including “bilateral” (B), “midline” (C) and “left” (D). (E) Graph depicting the scoring of *pk1a* morphants demonstrates a slight difference in localization of the exocrine pancreas ( $p=NS$  by chi-square test).

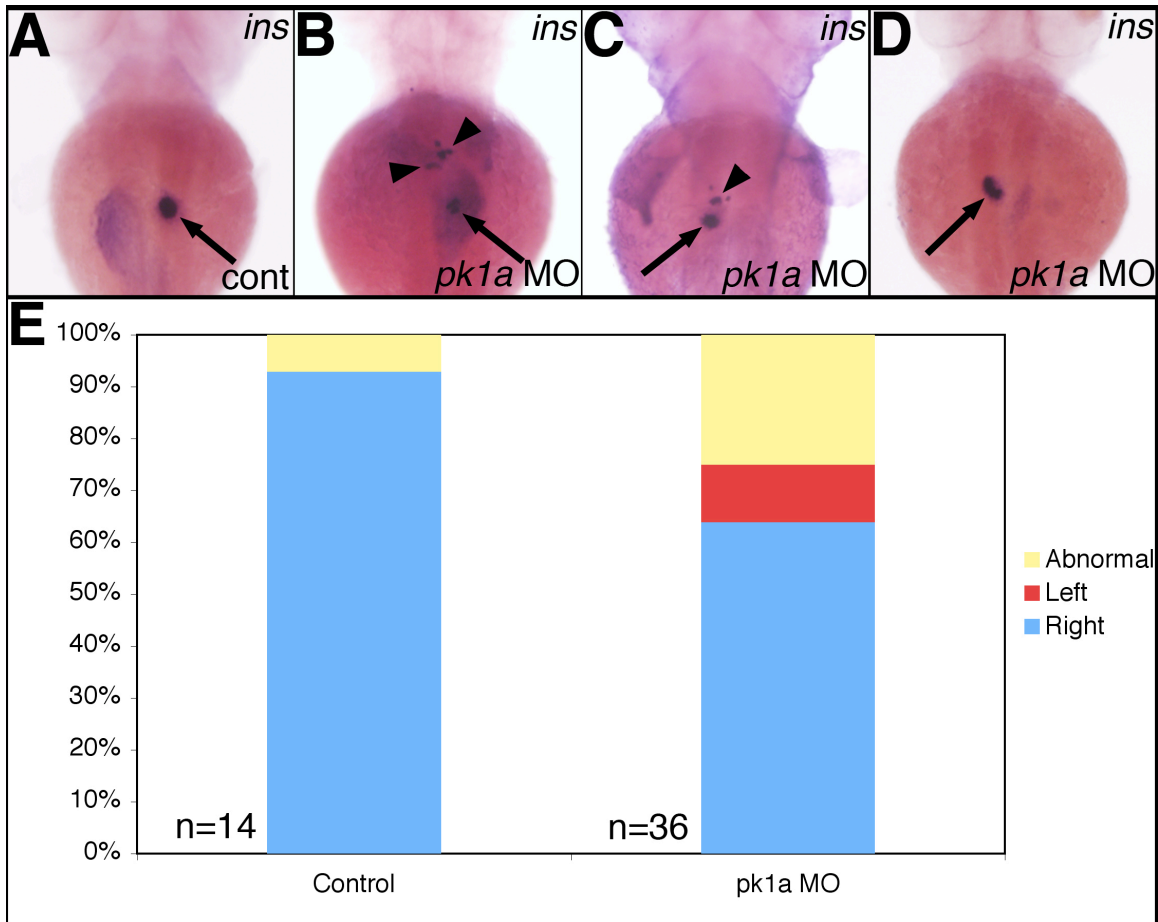

**Figure S5. Abnormal endocrine pancreas localization in *pk1a* morphants.** Whole-mount in situ hybridization of *insulin* (*ins*), an endocrine pancreas marker, in 3 dpf control (A) and *pk1a* morphants demonstrates abnormal exocrine pancreas location, including “abnormal” (B, C), and “left” (D). (E) Graph depicting the scoring of *pk1a* morphants demonstrates a significant difference in the localization of the endocrine pancreas ( $p < 0.0001$  by chi-square test). When combined with the localization of *try*, there is a significant difference in the localization of the pancreas in *pk1a* morphants ( $p < 0.0001$ ).

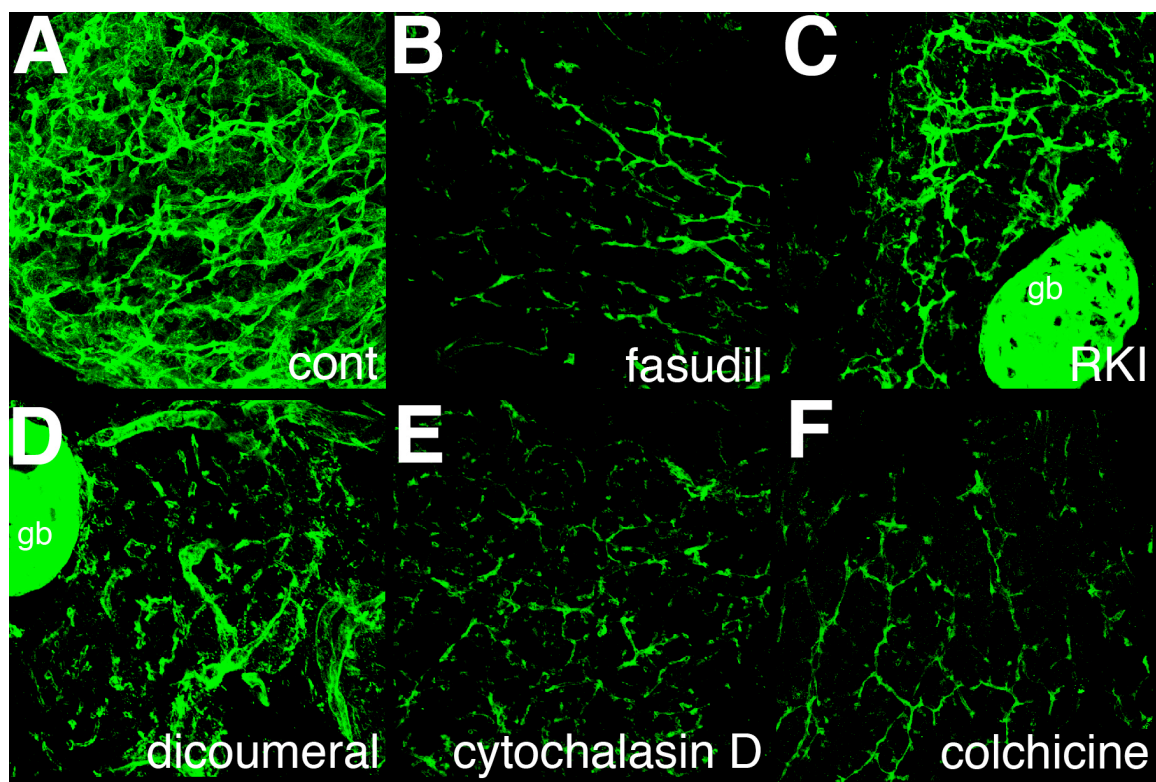

**Figure S6. Additional examples of inhibition of Rho kinase, JNK, and cytoskeletal architecture negatively affecting biliary development.** (A-F) Whole-mount projections of cytokeratin immunostaining of liver from a 5 dpf control larvae (A), compared to similar stainings from larvae treated with the Rho kinase inhibitors fasudil (B) and H-1152 (RKI, C), as well as the JNK inhibitor dicoumeral (D), the actin inhibitor cytochalasin D (E), and the microtubule and cytoskeleton inhibitor colchicine (F). gb, gallbladder.

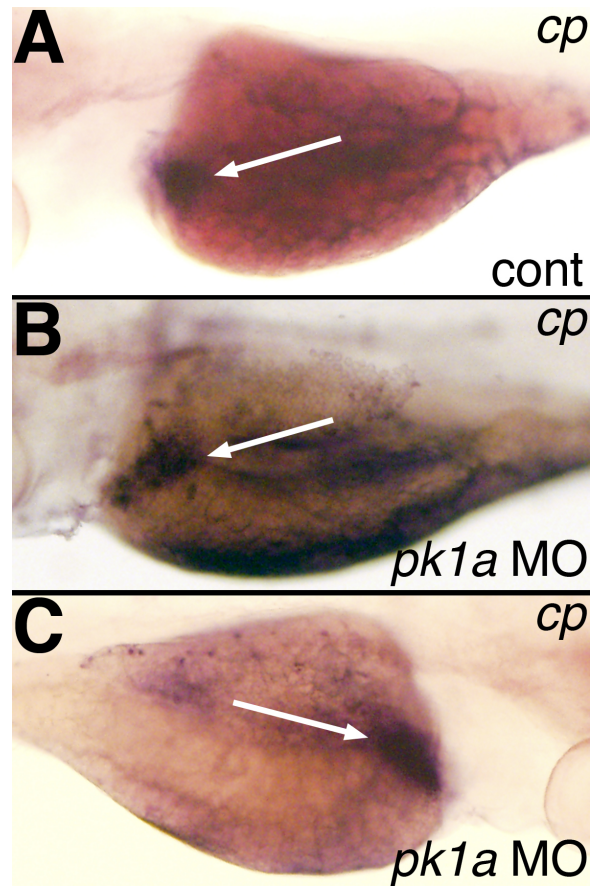

**Figure S7. Ceruloplasmin (*cp*) staining of 4 dpf larvae injected with *pk1a* MO.** (A) *In situ* hybridization of 4 dpf larva injected with control (cont) MO demonstrating liver staining (white arrow). (B-C) *In situ* hybridizations of 4 dpf larvae injected with *pk1a* MO demonstrating liver staining (white arrow) similar to (A). Views in A and B are left lateral, while that in C is right lateral, showing the liver on the right side, similar to other studies depicted here.

Supplementary Table 1. Sequences of primers and morpholino oligonucleotides.

| Name           | Sequence                                                      |
|----------------|---------------------------------------------------------------|
| Ankrd6 -F2     | AGA TGC TGC CGA GAA AGT GT                                    |
| Ankrd6-T3-B2   | GCG CGA AAT TAA CCC TCA CTA AAG TGG CTC TGT GTC TCC TGA TG    |
| Ankrd6-E4      | ACG AGA ATA TCC GCA GCA GT                                    |
| Ankrd6-E6      | TCC TCA ATG TCC AGG TCA CA                                    |
| Celsr1-F1      | AAC AAT GGC ACT ACC GAA GG                                    |
| Celsr1T3-B1    | GCG CGA AAT TAA CCC TCA CTA AAG AGT CAC AGG GGA AAC AGG TG    |
| Celsr2-F1      | CCC CTG TGG TCA GCA TAA CT                                    |
| Celsr2T3-B1    | GCG CGA AAT TAA CCC TCA CTA AAG TCA CCA GGA ACA ACA CGG TA    |
| Celsr3-F1      | GTC AGA CTG CGA CTG GAT CA                                    |
| Celsr3T3-B1    | GCG CGA AAT TAA CCC TCA CTA AAG CAG CTC CAC AAA AGG AGG AG    |
| Dsh2-F1        | CAG ATG TGG TGG AGT GGT TG                                    |
| Dsh2T3-B1      | GGA TCC ATT AAC CCT CAC TAA AGG GAC AGA CCC TGT TGC GGT TAA T |
| Dsh3-F1        | TGT GAT TTG TTG GCT GGT GT                                    |
| Dsh3T3-B1      | GGA TCC ATT AAC CCT CAC TAA AGG GAG CAA AGG AGC AAG AGT GTC C |
| Fabp2-F1       | CAA CGT GAA GGA AGT CAG CA                                    |
| Fabp2T3-B1     | GAA TTC ATT AAC CCT CAC TAA AGG GAT CAC AGT GCA AAT GAC ACG A |
| Ins-F1         | GCT CTG TTG GTC CTG TTG GT                                    |
| InsT3-B1       | GAA TTC ATT AAC CCT CAC TAA AGG GAG GAG AGC ATT AAG GCC TGT G |
| Prickle1a-F2   | AAG TGC GGT ACT GCC AGT CT                                    |
| Prickle1aT3-B2 | GGA TCC ATT AAC CCT CAC TAA AGG GAG TTT AAA GCT CGC TCC ATG C |
| Prickle1a-E6   | ATC ATG CAG CGT GTG AAC AT                                    |
| Prickle1a-E7   | GCA GTG CAC TTT CCC ATC AT                                    |
| Prickle1a-E8   | GTT TAA AGC TCG CTC CAT GC                                    |
| Prickle2-F1    | CCA GAG TGG GAA AGC TTC AG                                    |
| Prickle2T3-B1  | GCG CGA AAT TAA CCC TCA CTA AAG ATT GGC GTT GCT AAC CAA AC    |
| Try-F1         | GTC TCT GAA CAG CGG CTA CC                                    |
| TryT3-B1       | GAA TTC ATT AAC CCT CAC TAA AGG GAG AGC AGA CCT TGG CGT AAA C |
| Vangl2-E2      | CAG AGA CAG CAG CAG CAG AG                                    |
| Vangl2-I2      | CCA GGA GCA CTC CTC AAA CT                                    |
| Wnt11-F3       | GAG CTC ATG CAC AGC ATT GT                                    |
| Wnt11T3-B3     | GAA TTC ATT AAC CCT CAC TAA AGG GAC AGT CTC TTC CCC TCA GTG C |
| Wnt11r-F3      | CAC CAC AAA CCC ACC TCT CT                                    |
| Wnt11Rt3-B3    | GAA TTC ATT AAC CCT CAC TAA AGG GAT CCG TGT AAG GGT TGT AGC C |
| MO prickle-ATG | 5'CACCGCGATTCTCCAGTCCATCAC3'                                  |
| MO prickle-IE7 | 5'CCACACTGCACACACAGCACATTAC3'                                 |
| MO vangl2-ATG  | 5'GTACTGCGACTCGTTATCCATGTCG3'                                 |
| MO vangl2-EI2  | 5'GTGTA CTGACCCGATCATCTCCGCG3'                                |
| MO ankrd6-ATG  | 5'GAGGCATCGCGCTGGCTCATGAATC3'                                 |
| MO ankrd6-IE2  | 5'CTCATGTCTGAAGAGAATCCTGCA3'                                  |
